# Supplementary material for: Polyurethane–P2S5 composite-based solid-state electrolyte assists low polarization and high stability all-solid-state lithium-ion batteries
Source: Royal Society of Chemistry journal article supplement (doi:10.1039/d2ra05330f), 2022-01-01
Supplement: d2ra05330f1.pdf [file d2ra05330f1.pdf]

## Supporting information

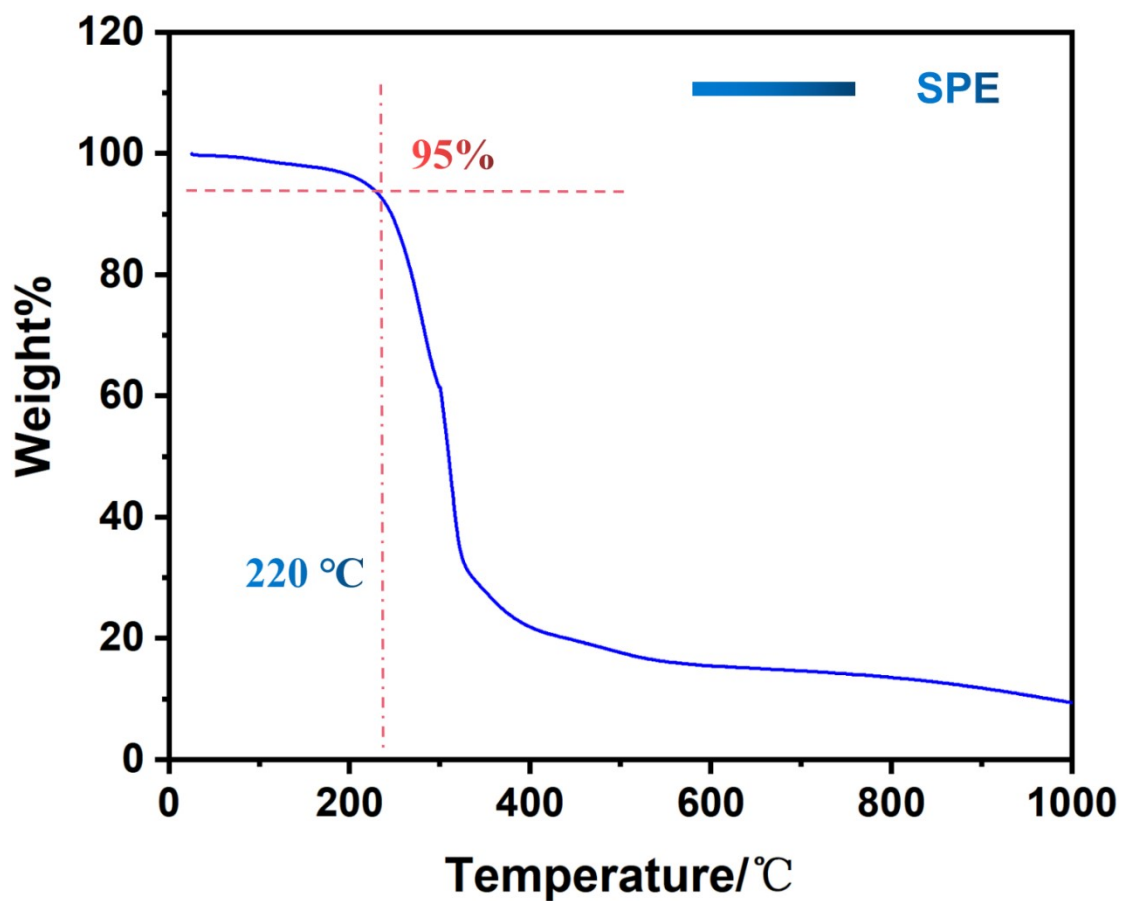

Figure S1. TGA curve of the PLAP membrane

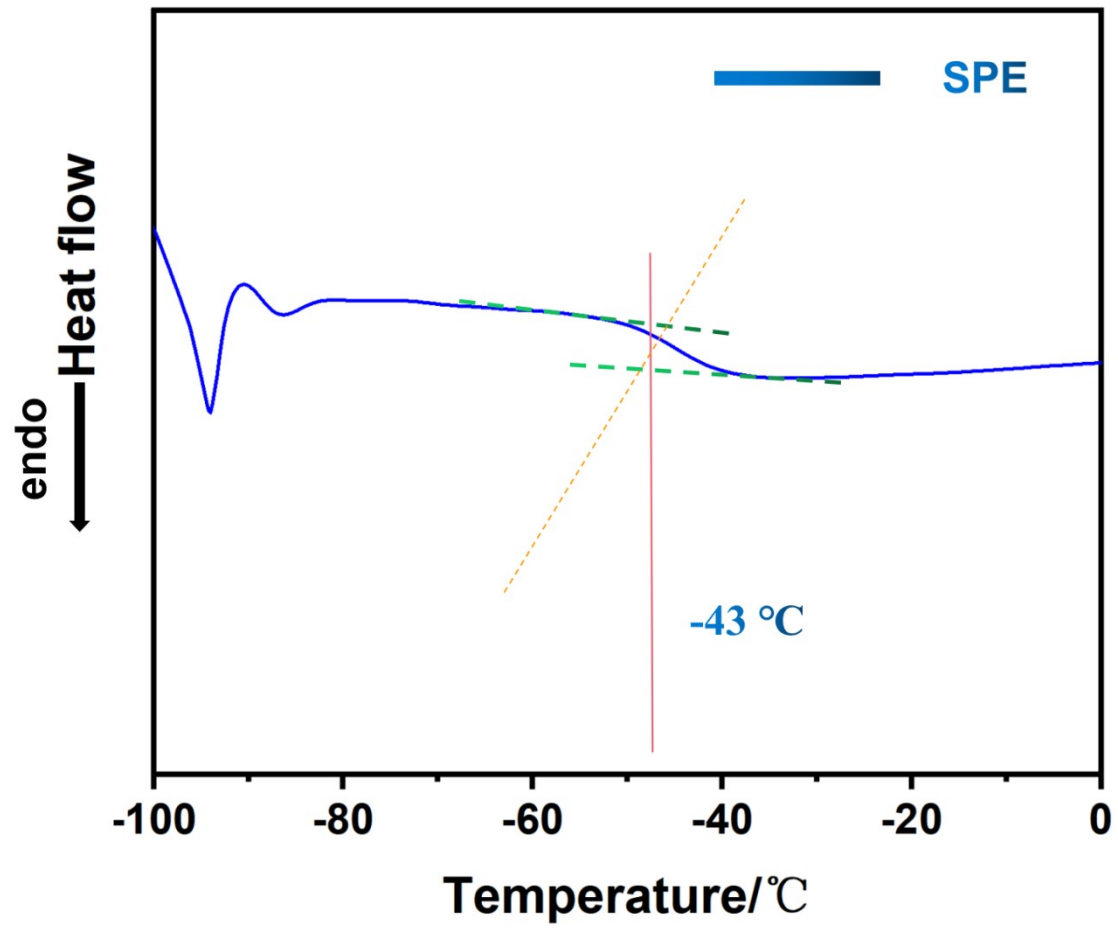

Figure S2. DSC curve of the PLAP membrane.

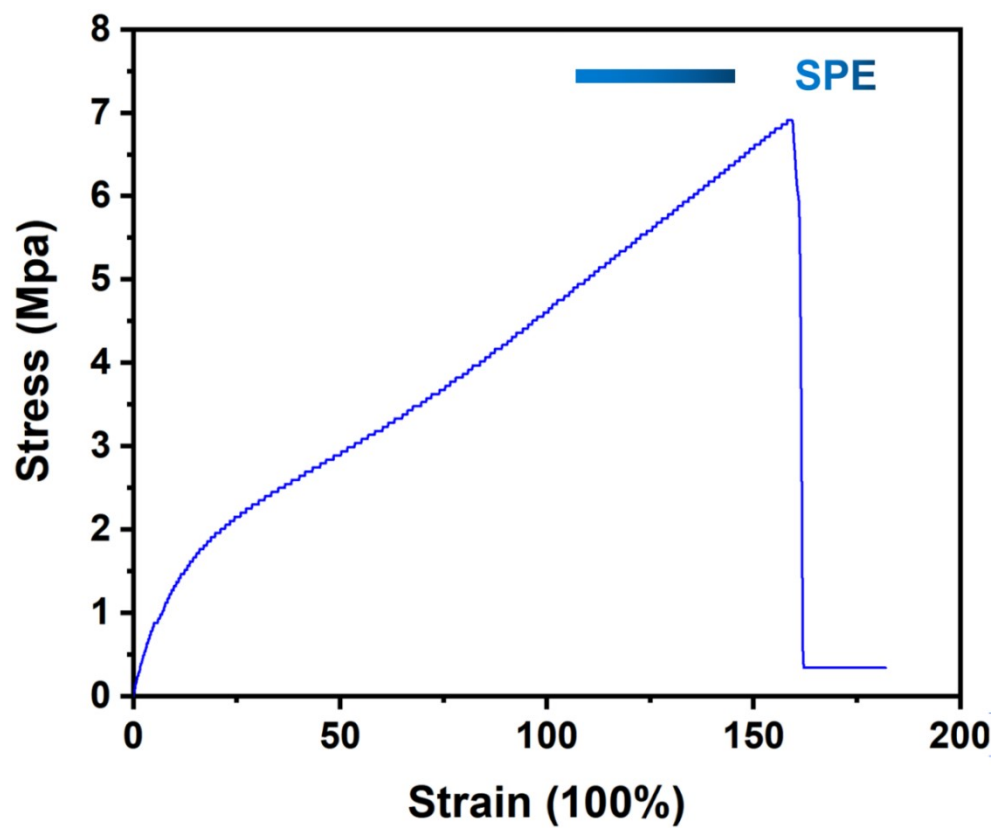

Figure S3. The stress-strain curve of as-prepared PLAP.

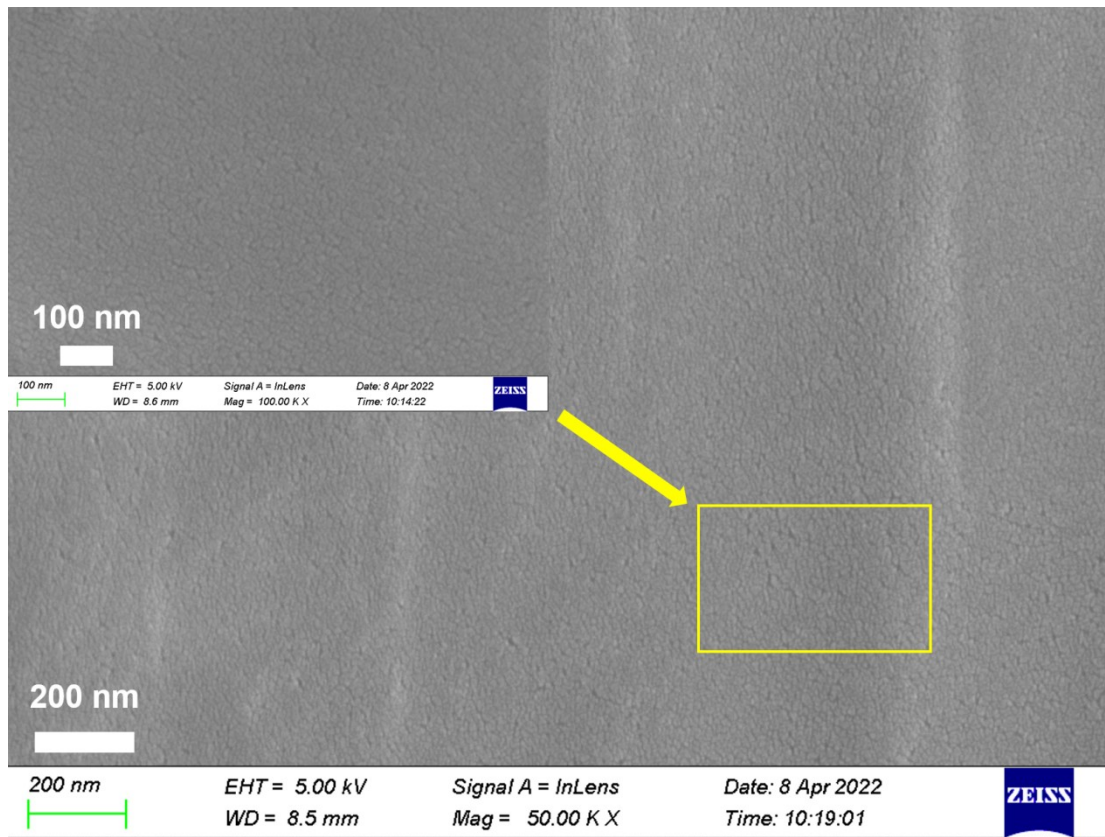

**Figure S4.** The surface morphology SEM image of PLAP.

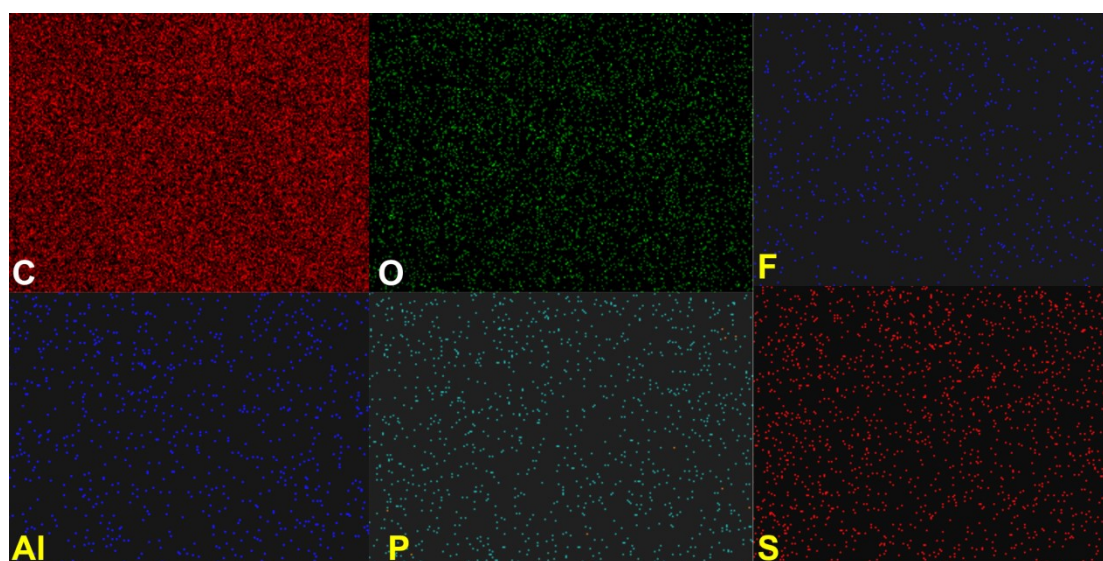

**Figure S5.** The elements mapping of PLAP.

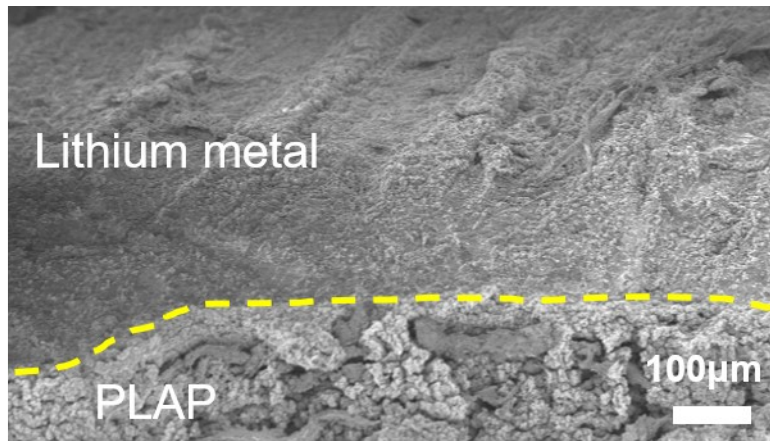

**Figure S6.** Cross-section SEM image of the interface between Lithium metal and PLAP.

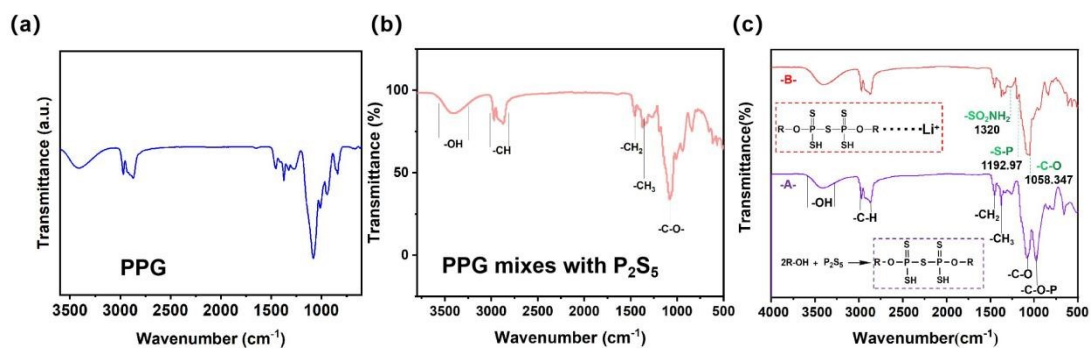

**Figure S7.** Infrared spectrum of (a) PPG ;(b) mixed with P<sub>2</sub>S<sub>5</sub> before reaction and (c) after the reaction of PPG and P<sub>2</sub>S<sub>5</sub>.





**Table S1** Ionic conductivity of PU/LiTFSI–Al<sub>2</sub>O<sub>3</sub>–xP<sub>2</sub>S<sub>5</sub> (x =0.1, 0.4, 0.8, 1.0, 1.5, 2.0) system

| Samples | PPG <sub>mol</sub> :P <sub>2</sub> S <sub>5</sub><br>mol | L <sup>a</sup> (thickness,<br>um) | R <sup>b</sup> (Ω) | S <sup>c</sup> =πr <sup>2</sup> (r=0.05<br>cm) | Conductivity (S cm <sup>-1</sup> ) |
|---------|----------------------------------------------------------|-----------------------------------|--------------------|------------------------------------------------|------------------------------------|
| 1       | 2:0.1                                                    | 300                               | 1274               | π/4                                            | 3.0×10 <sup>-5</sup>               |
| 2       | 2:0.4                                                    | 300                               | 273                | π/4                                            | 1.4×10 <sup>-4</sup>               |
| 3       | 2:0.8                                                    | 300                               | 106                | π/4                                            | 3.6×10 <sup>-4</sup>               |
| 4       | 2:1.0                                                    | 300                               | 50                 | π/4                                            | 7.4×10 <sup>-4</sup>               |
| 5       | 2:1.5                                                    | 300                               | 50                 | π/4                                            | 7.4×10 <sup>-4</sup>               |
| 6       | 2:2.0                                                    | 300                               | 50                 | π/4                                            | 7.4×10 <sup>-4</sup>               |

<sup>a</sup> The samples thickness. <sup>b</sup> Electrolyte impedance value. <sup>c</sup> Electrolyte area.

**Table S2.** Comparison of PU-based batteries

| Polymer matrix   | Lithium salt                   | Ionic conductivity                                           | Mechanical strength | Thermal stability | Battery performance                                                             | Ref  |
|------------------|--------------------------------|--------------------------------------------------------------|---------------------|-------------------|---------------------------------------------------------------------------------|------|
| This work (PLAP) | LiTFSI                         | 7.4×10 <sup>-4</sup> (25 °C)<br>4.3×10 <sup>-3</sup> (80 °C) | 7 Mpa               | 220               | LiFePO <sub>4</sub> /Li :168 (0.2 C) (25 °C)<br>143 (5 C) (25 °C)               |      |
| PEUU             | LiClO <sub>4</sub>             | ~10 <sup>-8</sup>                                            | NA                  | NA                | NA                                                                              | [1]  |
| PDXL-PU          | LiClO <sub>4</sub> (O/Li = 12) | 2 × 10 <sup>-5</sup>                                         | NA                  | NA                | NA                                                                              | [2]  |
| PE-BCPE          | LiTFSI                         | ~5.7 × 10 <sup>-4</sup>                                      | ~0.9 MPa (stress)   | NA                | LiFePO <sub>4</sub> /Li (1C, 133 mAh g <sup>-1</sup> )                          | [3]  |
| LPU              | LiClO <sub>4</sub>             | 2.7 × 10 <sup>-7</sup> (RT)                                  | NA                  | NA                | NA                                                                              | [4]  |
| HPU              | LiClO <sub>4</sub>             | 1.51 × 10 <sup>-5</sup>                                      | NA                  | NA                | NA                                                                              | [4]  |
| NWPU             | LiClO <sub>4</sub> (15 wt%)    | 5.44 × 10 <sup>-6</sup>                                      | NA                  | 176               | LiFePO <sub>4</sub> /Li (0.02C, 134 mAh g <sup>-1</sup> )                       | [5]  |
| WPU              | LiTFSI (20 wt%)                | 7.3 × 10 <sup>-4</sup> (60. °C)<br>2.2 × 10 <sup>-3</sup>    | 0.5 MPa (stress)    | ~250              | LiFePO <sub>4</sub> /Li (0.1C, 151 mAh g <sup>-1</sup> )<br>(2.2-4 V 60 °C)     | [6]  |
| PCPU             | LiTFSI (20 wt%)                | 1.12 × 10 <sup>-4</sup>                                      | 6 MPa               | 306               | LiFePO <sub>4</sub> /Li (1C, 134 mAh g <sup>-1</sup> )                          | [7]  |
| PDMS-WPU         | LiTFSI (20 wt%)                | 1.05 × 10 <sup>-5</sup>                                      | NA                  | 260               | NA                                                                              | [8]  |
| SLICPs           | NA                             | 8.91 × 10 <sup>-7</sup>                                      | NA                  | 288               | NA                                                                              | [9]  |
| SIPU             | NA                             | 9.8 × 10 <sup>-8</sup>                                       | NA                  | 200               | NA                                                                              | [10] |
| CL-PUA           | LiClO <sub>4</sub>             | ~10 <sup>-8</sup>                                            | > 0.7 MPa (neat PU) | > 400             | NA                                                                              | [11] |
| In-situ PUA      | LiClO <sub>4</sub> (60 wt%)    | 3.72 × 10 <sup>-3</sup>                                      | NA                  | NA                | NA                                                                              | [12] |
| PUA              | LiPF <sub>6</sub>              | 4.5 × 10 <sup>-3</sup><br>(20 °C)                            | NA                  | NA                | LiCoO <sub>2</sub> /graphite (0.2C, 147 mAh g <sup>-1</sup> ) (2.7-4.2 V 20 °C) | [13] |
| GPE-SN-IM        | LiTFSI                         | 1.63 × 10 <sup>-3</sup>                                      | 6.5 Mpa             | NA                | LiCoO <sub>2</sub> /Li                                                          | [14] |
| TPU-A            | LiClO <sub>4</sub>             | ~3 × 10 <sup>-4</sup>                                        | NA                  | NA                | NA                                                                              | [15] |
| Cellulose/PU     | LiTFSI                         | 4.8 × 10 <sup>-4</sup>                                       | NA                  | NA                | LiFePO <sub>4</sub> /Li                                                         | [16] |
| EPE-25           | LiTFSI                         | >10 <sup>-4</sup>                                            | ~1.3 MPa            | 295               | NMC622/Li                                                                       | [17] |

[1] Masayoshi Watanabe, Shinichiro Oohashi, Kohei Sanui, Naoya Ogata, Tadahiko Kobayashi, Zentarō Ohtaki, Morphology and ionic conductivity of polymer complexes formed by segmented polyether poly (urethane urea) and lithium perchlorate, *Macromolecules* 18 (10) (1985) 1945–1950, <https://doi.org/10.1021/ma00152a025>.

[2] Weihua Zhu, Bing Yan, Xinling Wang, Lei Wang, Xiaozhen Tang, Changzheng Yang, Structure and ionic conductive properties of olydioxolane–polyurethane-based electrolytes, *J. Appl. Polym. Sci.* 83 (1) (2002)103–111, [https://doi.org/10.1002/\(ISSN\)1097-462810.1002/app.v83:110.1002/app.10041](https://doi.org/10.1002/(ISSN)1097-462810.1002/app.v83:110.1002/app.10041).

[3] F. Croce, S. Sacchetti, B. Scrosati, Advanced, high-performance composite polymer electrolytes for lithium batteries, *J. Power Sources* 161 (1) (2006) 560–564, <https://doi.org/10.1016/j.jpowsour.2006.03.069>.

[4] L. Hong, L. Shi, X. Tang, Conductivities and spectroscopic studies of polymer electrolytes based on linear polyurethane and hybrid and copolymer of linear and hyperbranched polyurethanes, *Macromolecules* 36 (2003) 4989–4994, <https://doi.org/10.1021/ma034243y>.

[5] L. Hong, L. Shi, X. Tang, Conductivities and spectroscopic studies of polymer electrolytes based on linear polyurethane and hybrid and copolymer of linear and hyperbranched polyurethanes, *Macromolecules* 36 (2003) 4989–4994, <https://doi.org/10.1021/ma034243y>.

[6] L. Hong, L. Shi, X. Tang, Conductivities and spectroscopic studies of polymer electrolytes based on linear polyurethane and hybrid and copolymer of linear and hyperbranched polyurethanes, *Macromolecules* 36 (2003) 4989–4994, <https://doi.org/10.1021/ma034243y>.

- [7] J. Bao, G. Shi, C. Tao, C. Wang, C. Zhu, L. Cheng, G. Qian, C. Chen, Polycarbonate-based polyurethane as a polymer electrolyte matrix for all-solidstate lithium batteries, *J. Power Sources* 389 (2018) 84–92, <https://doi.org/10.1016/j.jpowsour.2018.04.020>.
- [8] Feng Wu, Yue Jiao Li, Ren Jie Chen, Shi Chen, Preparation and characterization of a mixing soft-segment waterborne polyurethane polymer electrolyte, *Chin. Chem. Lett.* 20 (1) (2009) 115–118, <https://doi.org/10.1016/j.ccl.2008.09.060>.
- [9] Y. Fei, S. Liu, Y. Long, L. Lu, Y. He, X. Ma, Y. Deng, New single lithium ion conducting polymer electrolyte derived from delocalized tetrazolate bonding to polyurethane, *Electrochim. Acta* 299 (2019) 902–913, <https://doi.org/10.1016/j.electacta.2019.01.071>.
- [10] L. Porcarelli, K. Manojkumar, H. Sardon, O. Llorente, A.S. Shaplov, K. Vijayakrishna, C. Gerbaldi, D. Mecerreyes, Single ion conducting polymer electrolytes based on versatile polyurethanes, *Electrochim. Acta* 241 (2017) 526–534, <https://doi.org/10.1016/j.electacta.2017.04.132>.
- [11] P. Santhosh, A. Gopalan, T. Vasudevan, Kwang-Pill Lee, Evaluation of a crosslinked polyurethane acrylate as polymer electrolyte for lithium batteries, *Mater. Res. Bull.* 41 (6) (2006) 1023–1037, <https://doi.org/10.1016/j.materresbull.2005.12.004>.
- [12] E.J. Lee, K.H. Park, Y.H. Lee, K.G. Kim, Y.U. Jeong, S.Y. Kim, H.D. Kim, Poly (urethane acrylate)-based gel polymer films for mechanically stable, transparent, and highly conductive polymer electrolyte applications, *J. Appl. Polym. Sci.* 134 (2017) 45009, <https://doi.org/10.1002/app.45009>.
- [13] H. Kim, G. Choi, S. Moon, S. Kim, Electrochemical properties of Li ion polymer battery with gel polymer electrolyte based on polyurethane, *J. Appl. Electrochem.* 33 (2003) 491–496, <https://doi.org/10.1023/A:1024458513004>.
- [14] Pengfei Lv, Yongsheng Li, Yuhan Wu, Guobiao Liu, Hao Liu, Shaomin Li, Changyu Tang, Jun Mei, Yuntao Li, interfaces, Robust succinonitrile-based gel polymer electrolyte for lithium-ion batteries withstanding mechanical folding and high temperature, *ACS Appl. Mater. Interfaces* 10 (30) (2018) 25384–25392,
- [15] Ten-Chin Wen, Yu-Lin Du, Mohanlal Digar, Compositional effect on the morphology and ionic conductivity of thermoplastic polyurethane based electrolytes, *Eur. Polym. J.* 38 (5) (2002) 1039–1048, [https://doi.org/10.1016/S0014-3057\(01\)00257-9](https://doi.org/10.1016/S0014-3057(01)00257-9).
- [16] K. Liu, M. Liu, J. Cheng, S. Dong, C. Wang, Q. Wang, X. Zhou, H. Sun, X. Chen, G. Cui, Novel cellulose/polyurethane composite gel polymer electrolyte for high performance lithium batteries, *Electrochim. Acta* 215 (2016) 261–266, <https://doi.org/10.1016/j.electacta.2016.08.076>.
- [17] Hyebeen Son, Hyun-Sik Woo, Myung-Soo Park, Ji Yun Min, Dong-Won Kim, Polyurethane-Based Elastomeric Polymer Electrolyte for Lithium Metal Polymer Cells with Enhanced Thermal Safety, *J. Electrochem. Soc.* 167 (8) (2020) 080525, <https://doi.org/10.1149/1945-7111/ab8ed2>.

**Table S3.** All the orbital comparisons of the elements

|              | Binding energy (eV)<br>(before/ after) | Full width high maximum (eV) | Area (cps, eV) | Content (%)<br>(before/ after) |
|--------------|----------------------------------------|------------------------------|----------------|--------------------------------|
| <b>C 1s</b>  |                                        |                              |                |                                |
| <b>C-C</b>   | <b>284.8 / 284.8</b>                   | 1.25                         | 34169.29       | <b>34.75 / 37.6</b>            |
| <b>C-O</b>   | <b>286.42 / 286.4</b>                  | 1.30                         | 55410.43       | <b>62.35/60.6</b>              |
| <b>O-C=O</b> | <b>289.01 / 289.4</b>                  | 1.06                         | 1874.94        | <b>2.9 / 1.8</b>               |

| <b>O 1s</b>                   |                       |      |          |                     |
|-------------------------------|-----------------------|------|----------|---------------------|
| <b>C-O</b>                    | <b>530.95 / 531.0</b> | 1.53 | 5714.34  | <b>7.58 / 5.7</b>   |
| <b>C=O/-OH</b>                | <b>532.64 / 532.6</b> | 1.53 | 85145.10 | <b>92.42 / 94.3</b> |
| <b>S 2p</b>                   |                       |      |          |                     |
| <b>-S- 2p<sub>3/2</sub></b>   | <b>161.5 / 162.1</b>  | 1.34 | 1393.28  | <b>31.5 / 30.3</b>  |
| <b>-S- 2p<sub>1/2</sub></b>   | <b>162.76 / 163.2</b> | 1.34 | 709.57   | <b>15.4 / 15.5</b>  |
| <b>S=P 2p<sub>3/2</sub></b>   | <b>163.53 / 163.6</b> | 1.20 | 1004.46  | <b>21.5 / 21.8</b>  |
| <b>S=P 2p<sub>1/2</sub></b>   | <b>164.83 / 164.7</b> | 1.20 | 512.93   | <b>11.31 / 11.2</b> |
| <b>O=S=O 2p<sub>3/2</sub></b> | <b>168.23 / 168.7</b> | 1.17 | 651.91   | <b>14.01 / 14.2</b> |
| <b>O=S=O 2p<sub>1/2</sub></b> | <b>169.3 / 169.8</b>  | 1.17 | 327.05   | <b>6.93 / 7.0</b>   |
| <b>P 2p</b>                   |                       |      |          |                     |
| <b>P 2p<sub>3/2</sub></b>     | <b>133.22 / 133.7</b> | 1.65 | 1693.01  | <b>56.01 / 56.5</b> |
| <b>P 2p<sub>1/2</sub></b>     | <b>134.21 / 134.4</b> | 1.79 | 1307.81  | <b>43.32 / 43.5</b> |
| <b>Li 1s</b>                  |                       |      |          |                     |
| <b>Li-S</b>                   | <b>55.4 / 55.4</b>    | 2.19 | 126.73   | <b>100 / 100</b>    |
